# Supplementary material
Source: Springer Nature journal article supplement (https://www.springermedizin.de/resource/supplementary/12978_2013_211_MOESM2_ESM.pdf/9602256)
Supplement: MOESM2 [file 9602256]

## Electronic Database Search

(n = 284 unique references after removing duplicates)

### Number of references identified in each database

- MEDLINE (n = 110)
- CINAHL (n = 6)
- EMBASE (n = 117)
- PsycINFO (n = 5)
- Global Health (n = 7)
- Web of Science (n = 81)
- EconLit (n = 0)
- CSA Multi-Search (International Bibliography of the Social Sciences, Social Services Abstracts, Sociological Abstracts) (n = 12)

### Abstract Review

(n = 284)

### References excluded based on abstract review

(n = 255)

#### Reason for exclusion

- Does not address DMPA spread as its primary topic (n = 218)
- Does not address dissemination, diffusion, scale up, or sustainability of DMPA (n = 37)

### Full Text Screening

(n = 29)

### References excluded based on full text review

(n = 19)

#### Reason for exclusion

- Does not address DMPA spread as its primary topic (n = 3)
- Does not address dissemination, diffusion, scale up, or sustainability of DMPA (n = 5)
- Only superficial description/no empirical evidence (n = 7)
- Does not address low- or middle-income countries (n = 3)
- Full text is not available online (n = 1)
- Language is not English, Spanish, French, or Portuguese (n = 0)

### Data Extraction

(n = 10)

+ Grey literature (same screen as peer reviewed)(n = 9)

### Final sample

n = 19
